# Supplementary material for: A highly selective and sensitive probe for colorimetric and fluorogenic detection of Cd2+ in aqueous media
Source: Royal Society of Chemistry journal article supplement (doi:10.1039/c3an36884j), 2013-01-01

## Supporting Information

# A highly selective and sensitive probe for colorimetric and fluorogenic detection of Cd<sup>2+</sup> in aqueous media

Shyamaprosad Goswami,<sup>\*a</sup> Krishnendu Aich<sup>a</sup>, Sangita Das<sup>a</sup>, Avijit Kumar Das<sup>a</sup>, Abhishek Manna<sup>a</sup> and Sandipan Halder<sup>b</sup>

<sup>a</sup>Department of Chemistry, Bengal Engineering and Science University, Shibpur, Howrah, INDIA, 711 103, Tel. +91-33-2668 4561-3 ext. 498; Fax. +91-33-2668 2916.

e-mail [spgoswamical@yahoo.com](mailto:spgoswamical@yahoo.com)

<sup>b</sup>Department of Chemistry, Indian Institute of Technology, Kanpur, India

### CONTENTS

|                                                                                       |       |
|---------------------------------------------------------------------------------------|-------|
| 1. General method of UV-vis and fluorescence titration .....                          | 2-3   |
| 2. Determination of detection limit.....                                              | 4     |
| 3. ESI MS spectrum of compound B.....                                                 | 5     |
| 4. <sup>1</sup> H NMR spectrum of compound B.....                                     | 6     |
| 5. <sup>1</sup> H NMR spectrum of the receptor .....                                  | 7     |
| 6. Mass spectrum (ESI-MS) of the receptor .....                                       | 8     |
| 7. <sup>13</sup> C NMR spectrum of the receptor.....                                  | 9-10  |
| 8. IR spectra of the receptor and its Cd <sup>2+</sup> complexes .....                | 11    |
| 9. ESI-MS spectrum of Cd <sup>2+</sup> complex of the receptor.....                   | 12    |
| 10. UV-vis titration spectra of the receptor with different guest cations.....        | 13-14 |
| 10. Fluorescence titration spectra of the receptor with different guest cations ..... | 15-16 |

## General method of UV-vis and fluorescence titration:

### By UV-vis method

UV-vis spectra were recorded on a JASCO V-530 spectrophotometer using a dissolution cell of 10 mm path and the fluorescence spectra were recorded on a PTI spectrophotometer using a fluorescence cell (10 mm). For UV-vis titrations, stock solution of receptor was prepared ( $c = 6 \times 10^{-6} \text{ ML}^{-1}$ ) in  $\text{CH}_3\text{OH-H}_2\text{O}$  (1:4 v/v) in the presence of HEPES buffer solution (pH 7.1). For fluorescence titrations, stock solution of receptor was prepared ( $c = 3 \times 10^{-6} \text{ ML}^{-1}$ ) in  $\text{CH}_3\text{OH-H}_2\text{O}$  (1:4 v/v) in the presence of HEPES buffer solution (pH 7.1). The solution of the guest cations using their perchlorate salts in the order of  $2 \times 10^{-5} \text{ M}$  were prepared in deionised water. Solutions of various concentrations containing host and increasing concentrations of cations were prepared separately. The spectra of these solutions were recorded by means of UV-vis methods. Binding constant was calculated according to the Benesi-Hildebrand equation.  $Ka$  was calculated following the equation stated below.

$$1/(A-A_0) = 1/\{K(A_{\max}-A_0) [M^{n+}]^n\} + 1/[A_{\max}-A_0]$$

Here  $A_0$  is the absorbance of receptor in the absence of guest,  $A$  is the absorbance recorded in the presence of added guest,  $A_{\max}$  is absorbance in presence of added  $[M^{n+}]_{\max}$  and  $K$  is the association constant. The association constant ( $K$ ) could be determined from the slope of the straight line of the plot of  $1/(A-A_0)$  against  $1/[M^{n+}]$  and is found to be  $1.656 \times 10^{-5} \text{ M}$ .

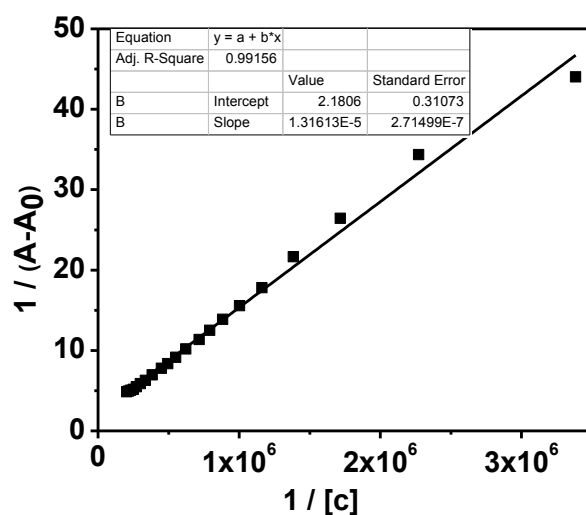

**Figure S1:** Benesi-Hildebrand plot from absorption titration data of receptor ( $6 \mu\text{M}$ ) with  $\text{Cd}^{2+}$ .

## General procedure for drawing Job plot by UV–vis method

Stock solution of same concentration of the receptors and the guest were prepared in the order of ca.  $1.0 \times 10^{-5} \text{ ML}^{-1} \text{ CH}_3\text{OH-H}_2\text{O}$  (1:4,  $v/v$ ). The absorbance in each case with different *host–guest* ratio but equal in volume was recorded. Job plots were drawn by plotting  $\Delta I \cdot X_{\text{host}}$  vs  $X_{\text{host}}$  ( $\Delta I$  = change of intensity of the absorbance spectrum during titration and  $X_{\text{host}}$  is the mole fraction of the host in each case, respectively).

## By fluorescence method:

The binding constant value of  $\text{Cd}^{2+}$  with receptor has been determined from the emission intensity data following the modified Benesi–Hildebrand equation,<sup>2</sup>  $1/\Delta I = 1/\Delta I_{\text{max}} + (1/K[C])(1/\Delta I_{\text{max}})$ . Here  $\Delta I = I - I_{\text{min}}$  and  $\Delta I_{\text{max}} = I_{\text{max}} - I_{\text{min}}$ , where  $I_{\text{min}}$ ,  $I$ , and  $I_{\text{max}}$  are the emission intensities of receptor considered in the absence of  $\text{Cd}^{2+}$ , at an intermediate  $\text{Cd}^{2+}$  concentration, and at a concentration of complete saturation where  $K$  is the binding constant and  $[C]$  is the  $\text{Cd}^{2+}$  concentration respectively. From the plot of  $[1 / (I_{\text{min}} - I)]$  against  $[C]^{-1}$  for receptor, the value of  $K$  has been determined from the slope. The association constant ( $K_a$ ) as determined by fluorescence titration method for the receptor with  $\text{Cd}^{2+}$  is found to be  $6.808 \times 10^5 \text{ M}^{-1}$  (error < 10%).

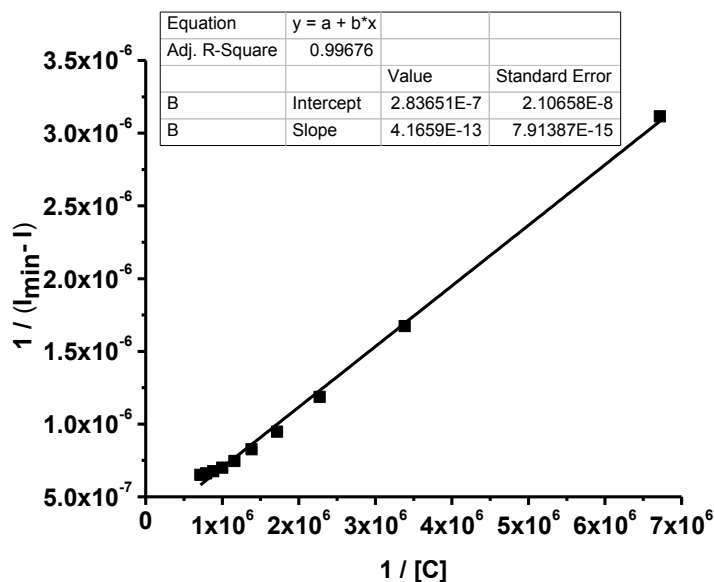

**Figure S2:** Benesi–Hildebrand plot from fluorescence titration data of receptor (3  $\mu\text{M}$ ) with  $\text{Cd}^{2+}$ .

### **Determination of detection limit:**

The detection limit (DL) of **RQ** for  $\text{Cd}^{2+}$  was determined from the following equation:

$$\text{DL} = K * \text{Sb}_1 / S$$

Where  $K = 2$  or  $3$  (we take  $3$  in this case);  $\text{Sb}_1$  is the standard deviation of the blank solution;  $S$  is the slope of the calibration curve.

#### **For UV-vis:**

From the graph, we get slope = 43180.32, and  $\text{Sb}_1$  value is 0.010213

Thus using the formula we get the Detection Limit =  $7.09 \times 10^{-7}$  M i.e. RQ can detect  $\text{Cd}^{2+}$  in this minimum concentration through UV-vis method.

#### **For Fluorescence:**

From the graph we get slope =  $1.44 \times 10^{12}$ , and  $\text{Sb}_1$  value is 94366.66

Thus using the formula we get the Detection Limit =  $1.97 \times 10^{-7}$  M i.e. RQ can detect  $\text{Cd}^{2+}$  in this minimum concentration through fluorescence method.

### ESI MS spectra of compound B:

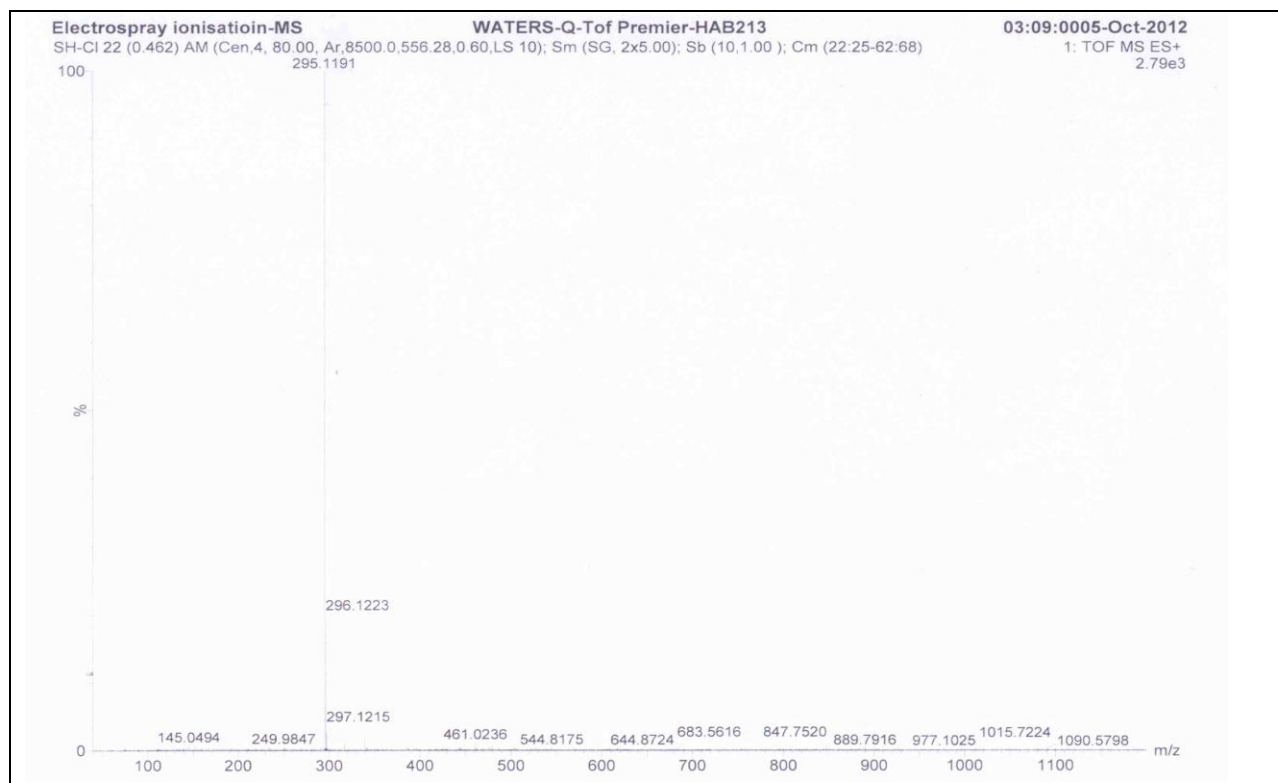

Figure S3: ESI TOF mass spectra of the compound B.

# <sup>1</sup>H NMR spectra of the compound B:

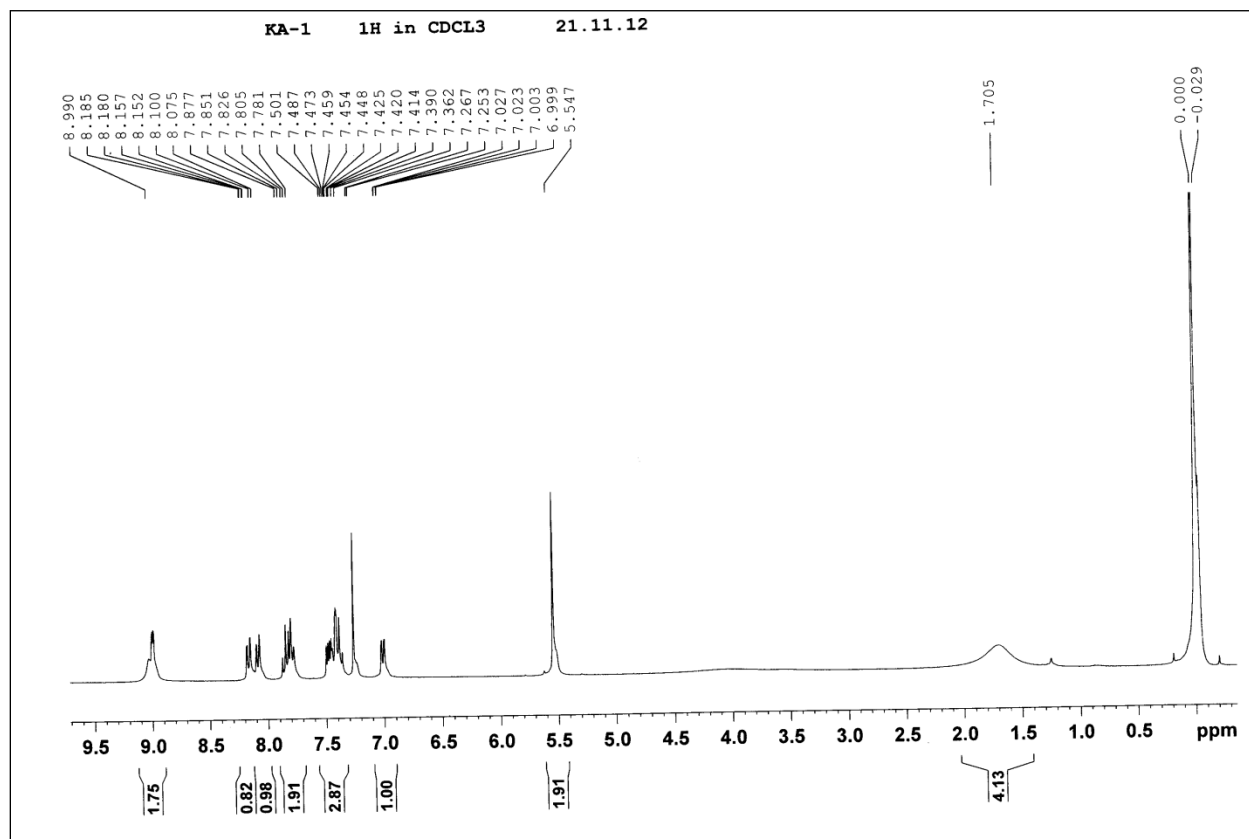

Figure S4: <sup>1</sup>H NMR (300 MHz) spectra of compound B in CDCl<sub>3</sub>.

**<sup>1</sup>H NMR spectra of the receptor:**

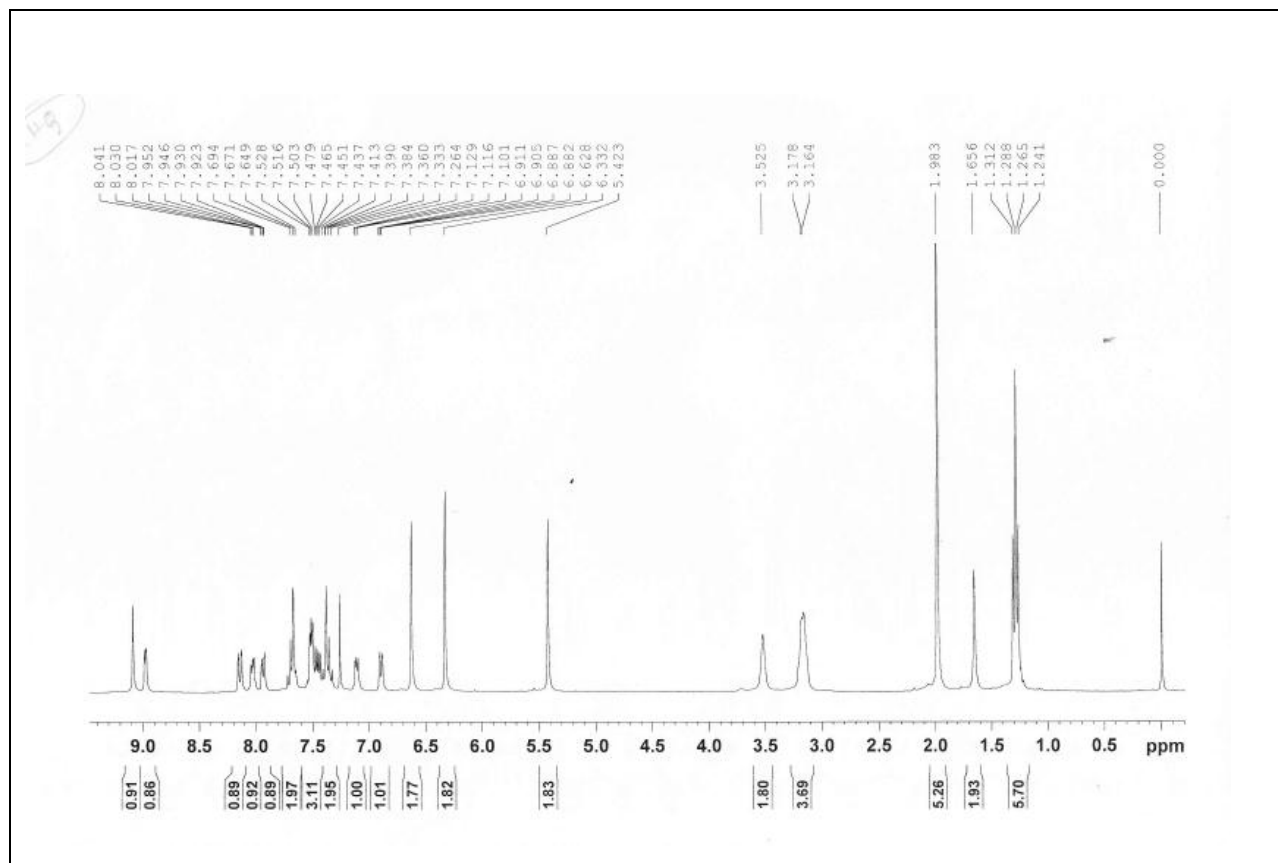

**Figure S5: <sup>1</sup>H NMR (300 MHz) spectra of the receptor in CDCl<sub>3</sub>.**

**ESI MS spectra of the receptor:**

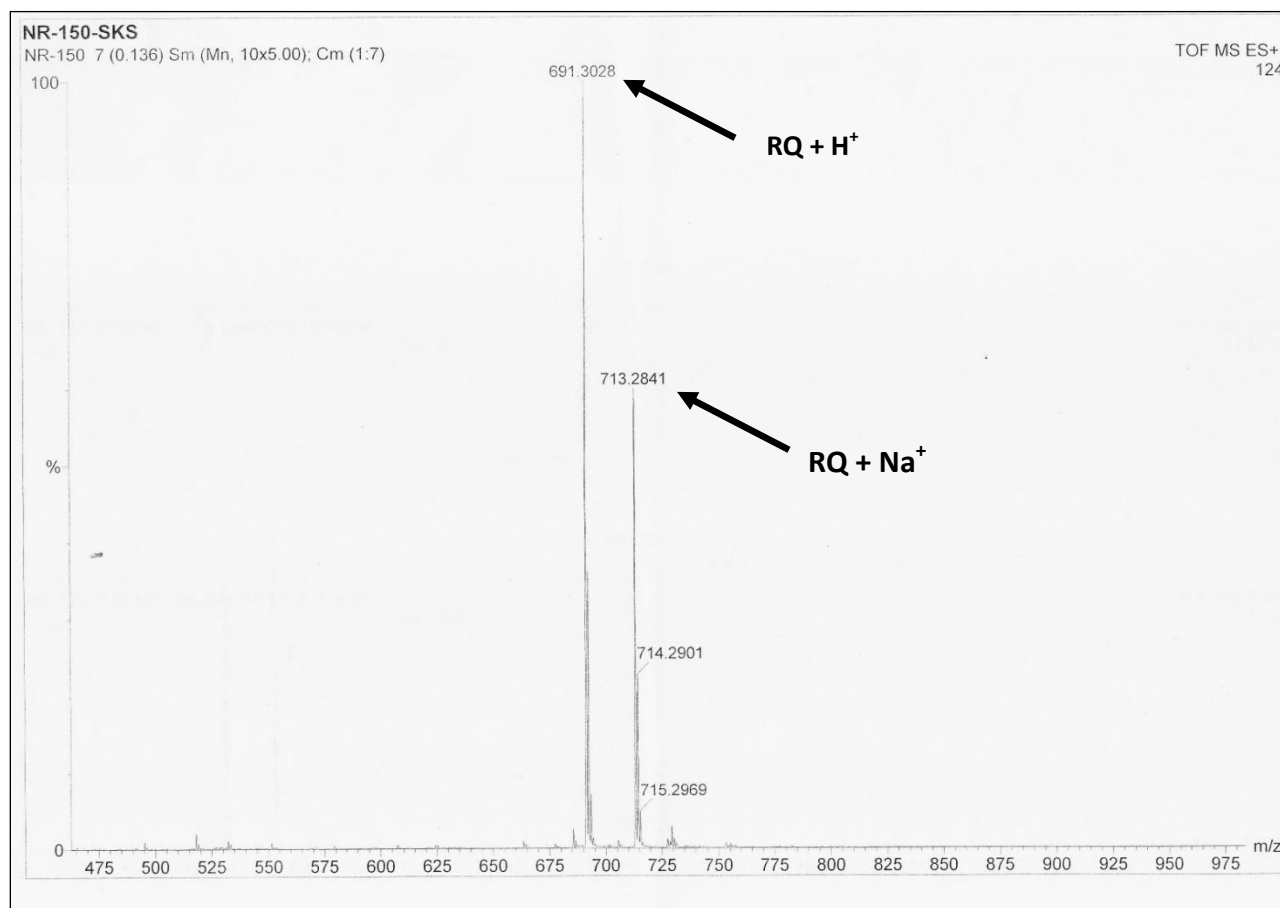

**Figure S6: ESI TOF mass spectra of the receptor.**



### $^{13}\text{C}$ NMR spectra of the receptor:

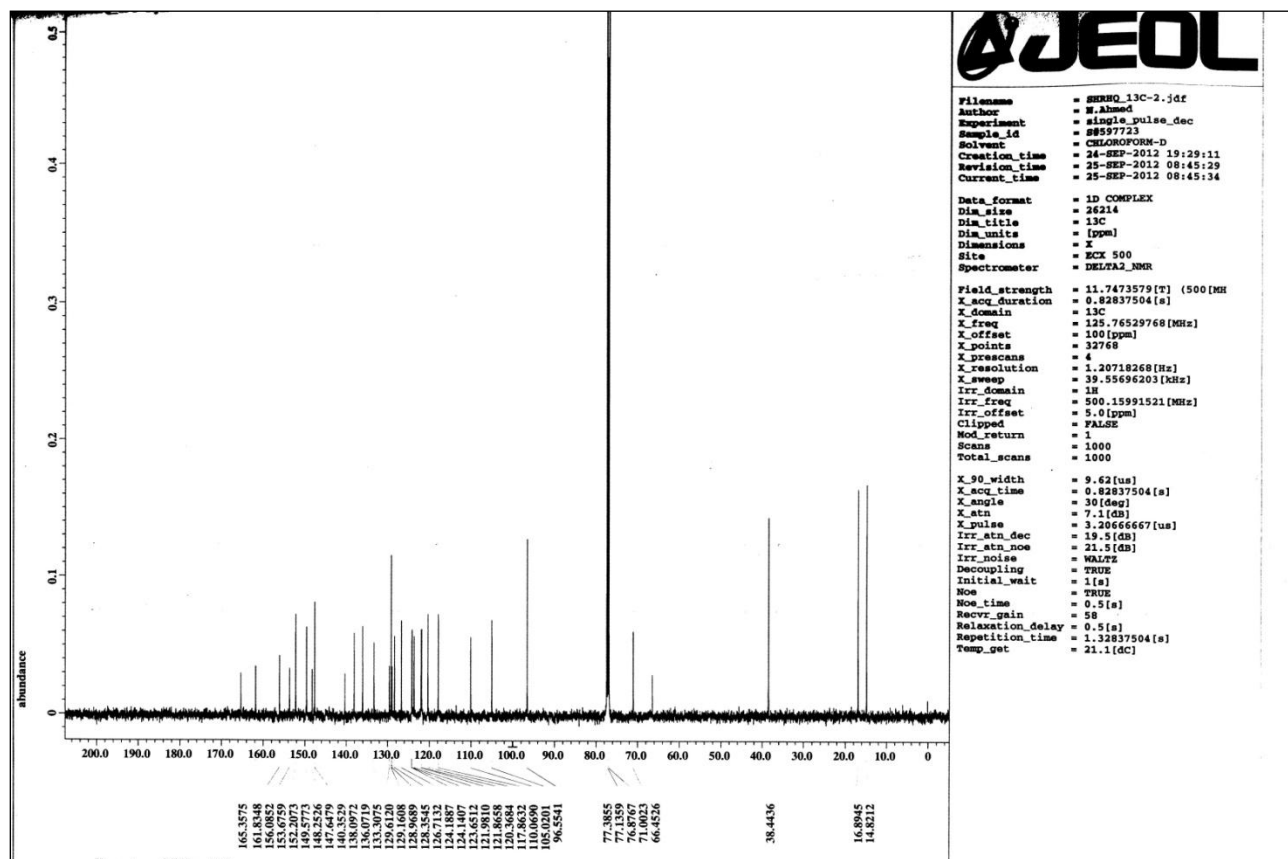

Figure S7:  $^{13}\text{C}$  NMR (100 MHz) spectra of the receptor in  $\text{CDCl}_3$ .

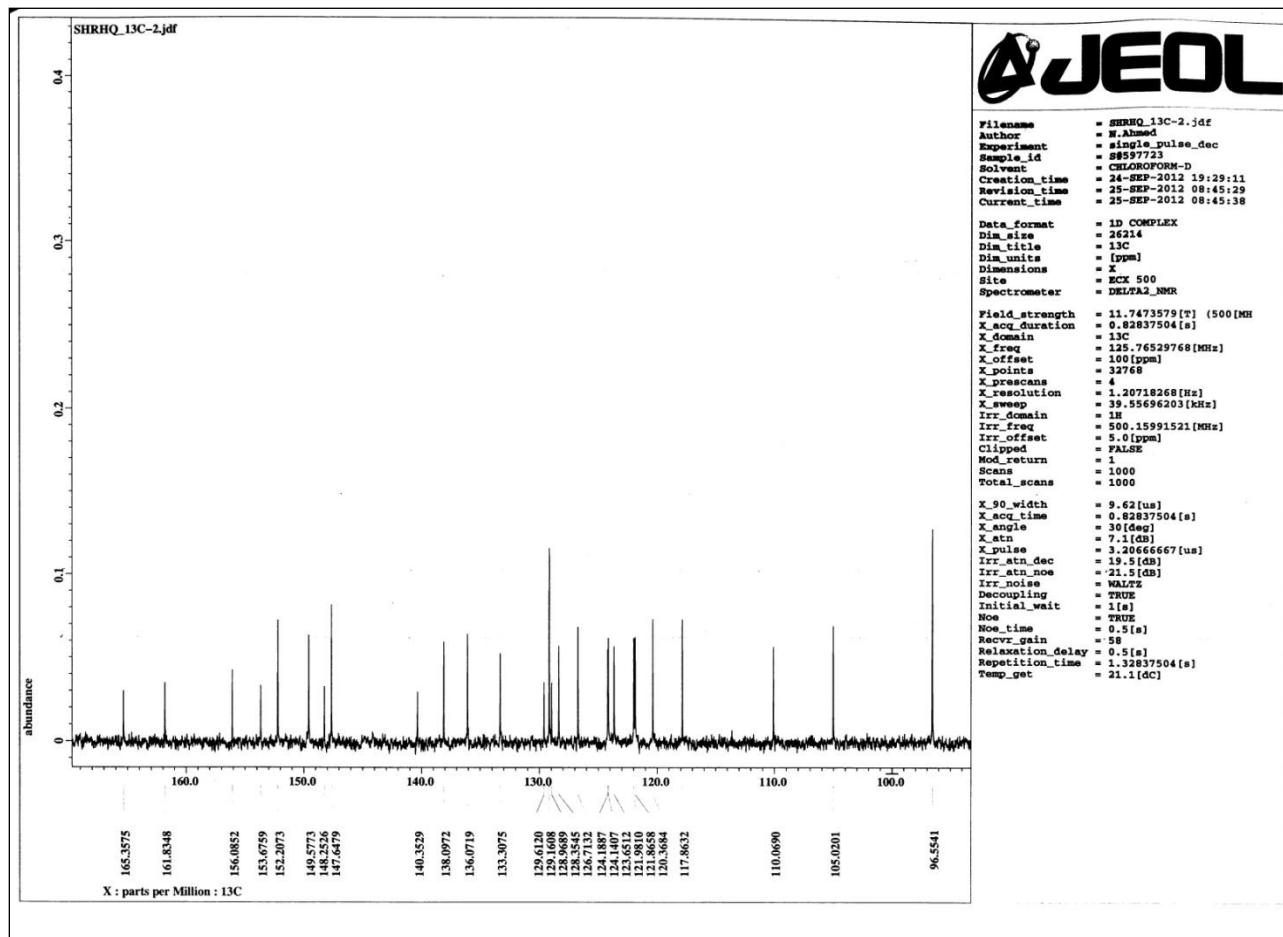

Figure S8: Expansion mode of the  $^{13}\text{C}$  NMR spectra of the receptor in  $\text{CDCl}_3$ .

**IR spectra of the receptor and its Cd<sup>2+</sup> complex:**

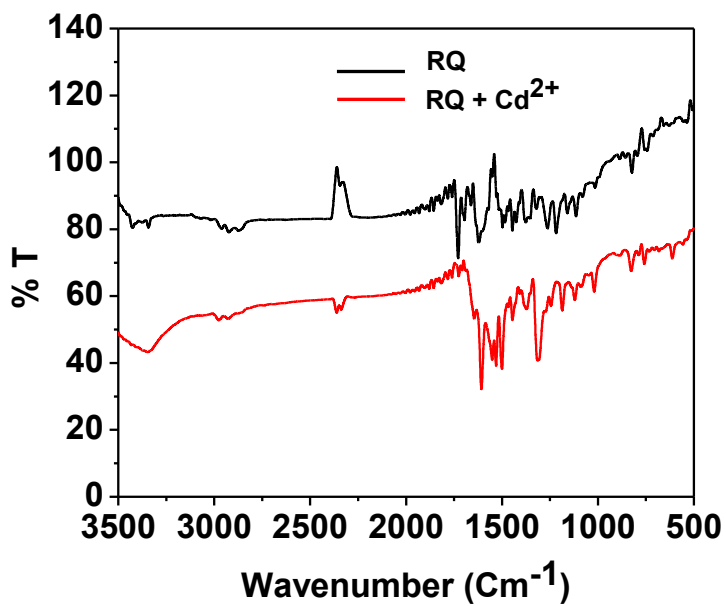

**Figure S9: FT IR spectra of the receptor and its complex with Cd<sup>2+</sup>.**

### ESI-MS of Cd<sup>2+</sup> complex of the receptor:

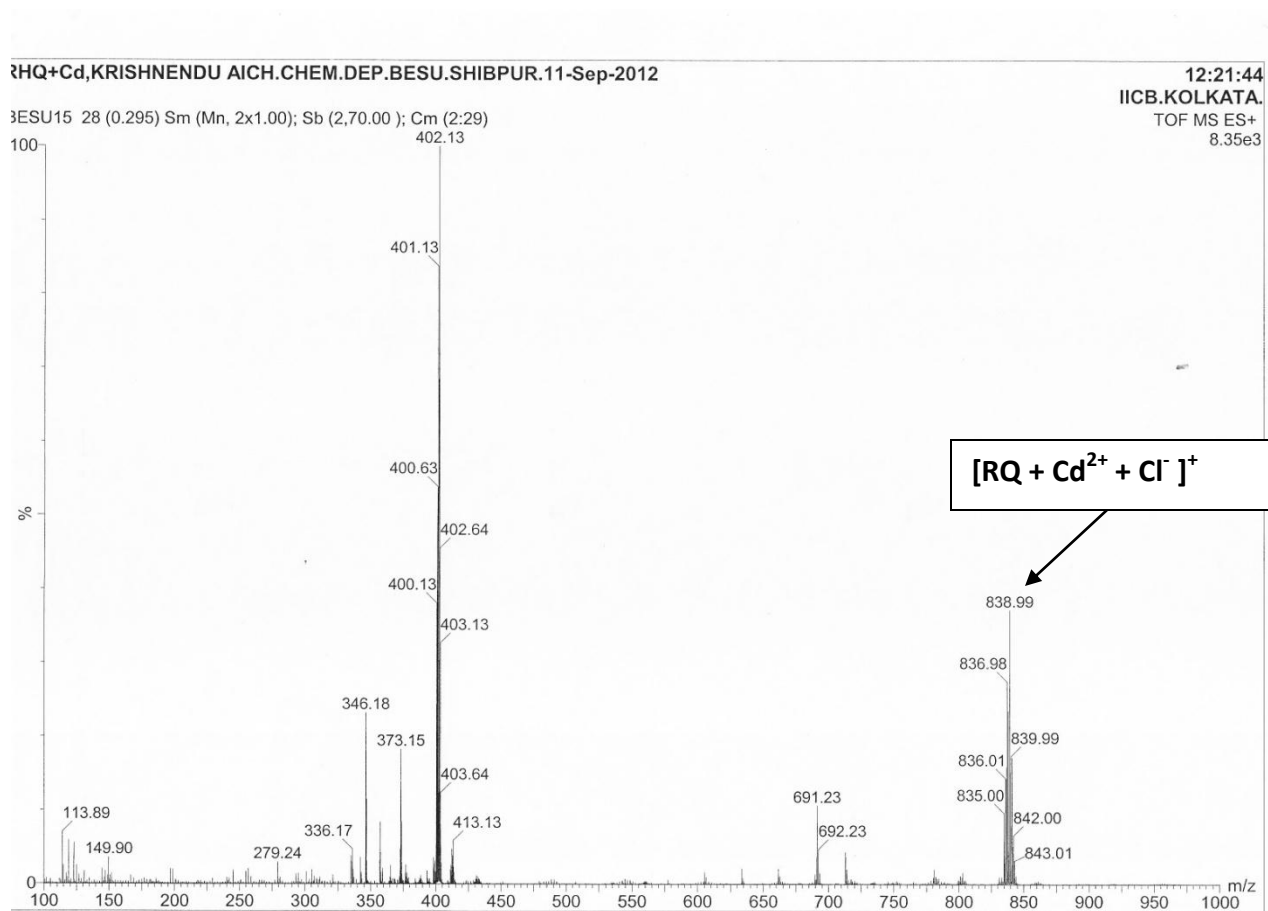

Figure S10: ESI TOF mass spectra of the Cd<sup>2+</sup> complex of the receptor.

UV-vis titration spectra of the receptor with different guest cations in CH<sub>3</sub>OH-HEPES  
buffer solution (1:4, v/v, pH= 7.1):

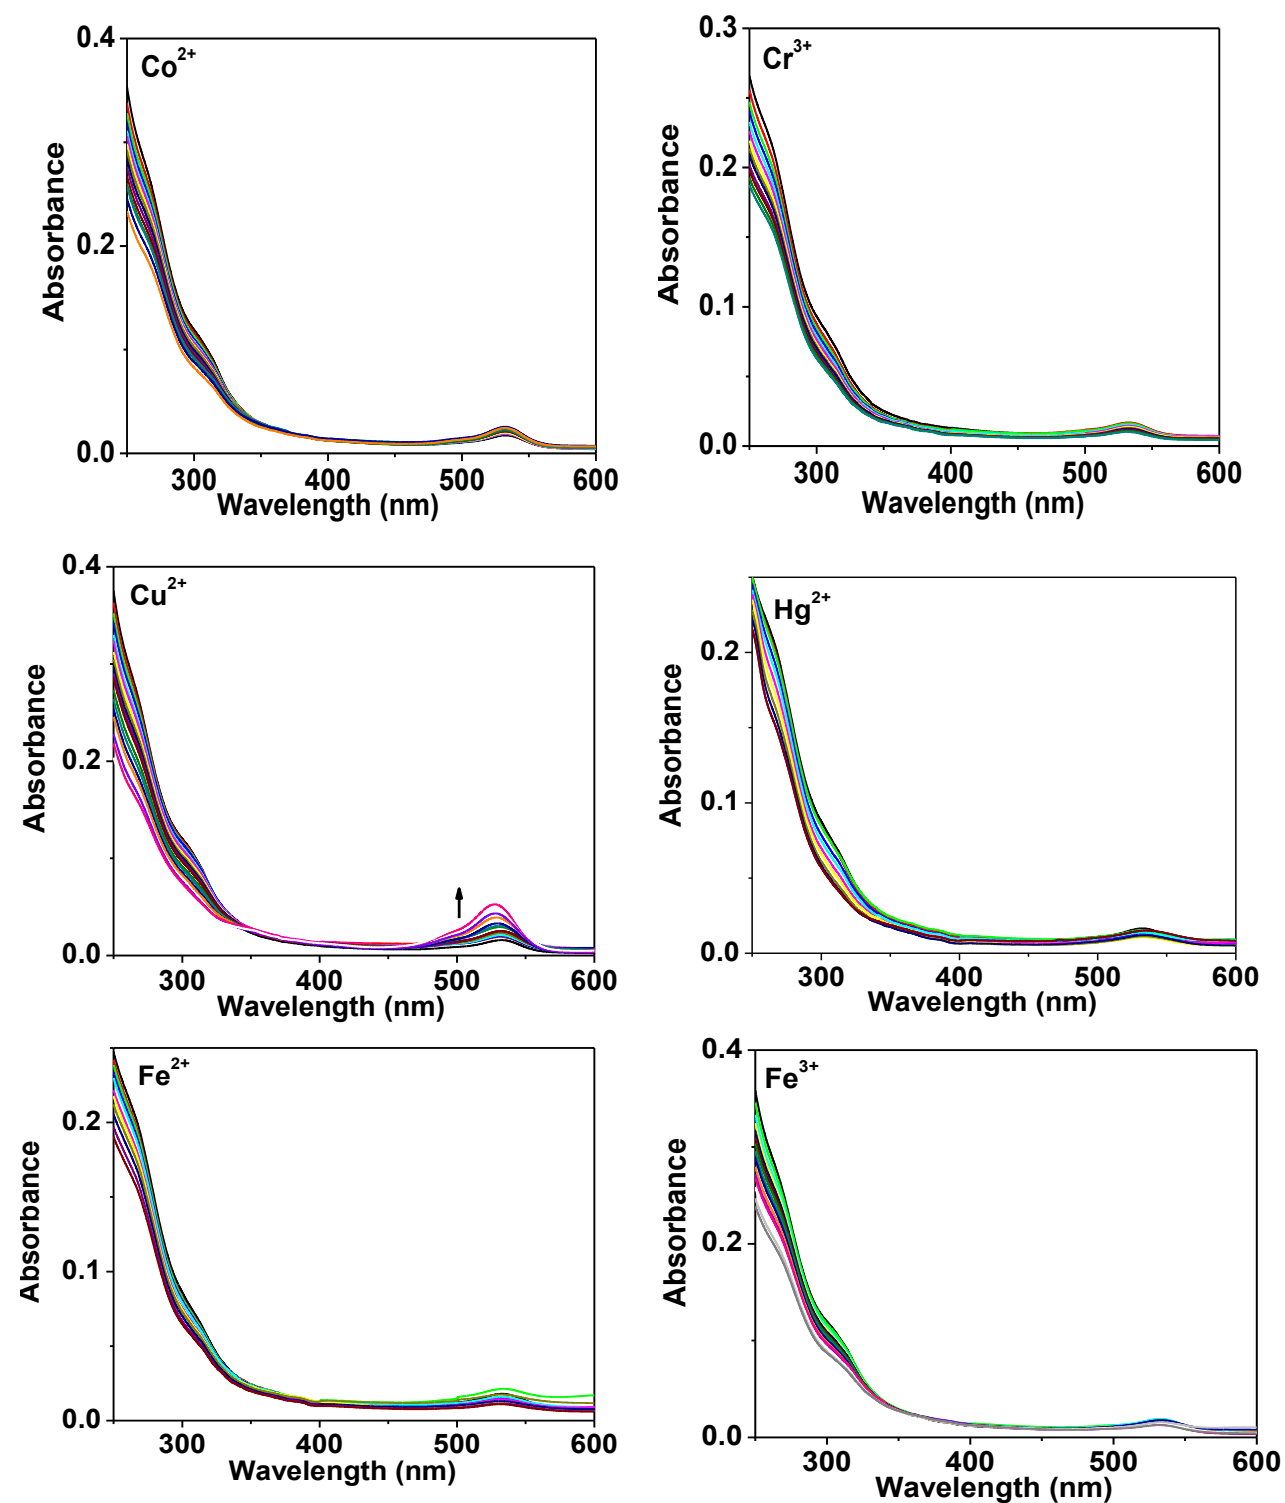

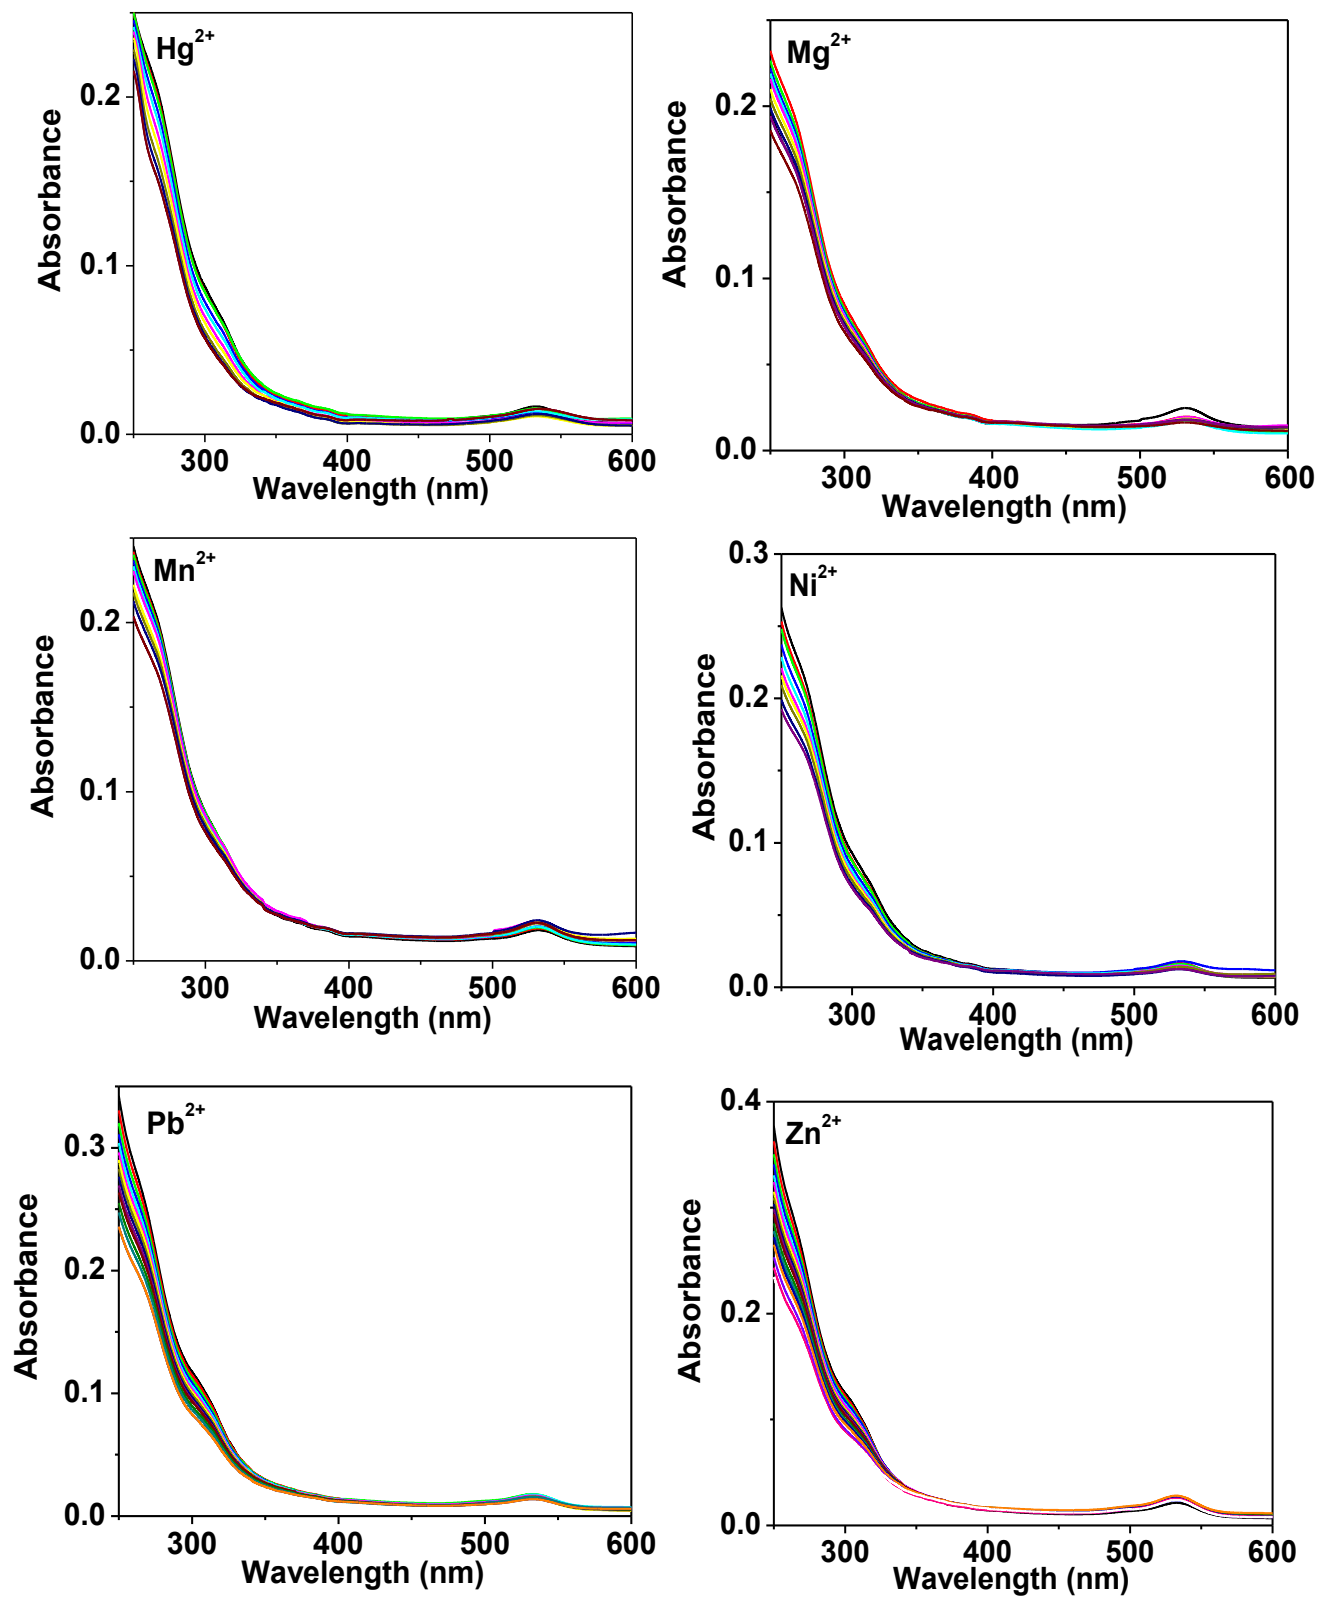

**Fluorescence emission spectra of the receptor with different guest cations in CH<sub>3</sub>OH-  
HEPES buffer solution (1:4, v/v, pH = 7.1):**

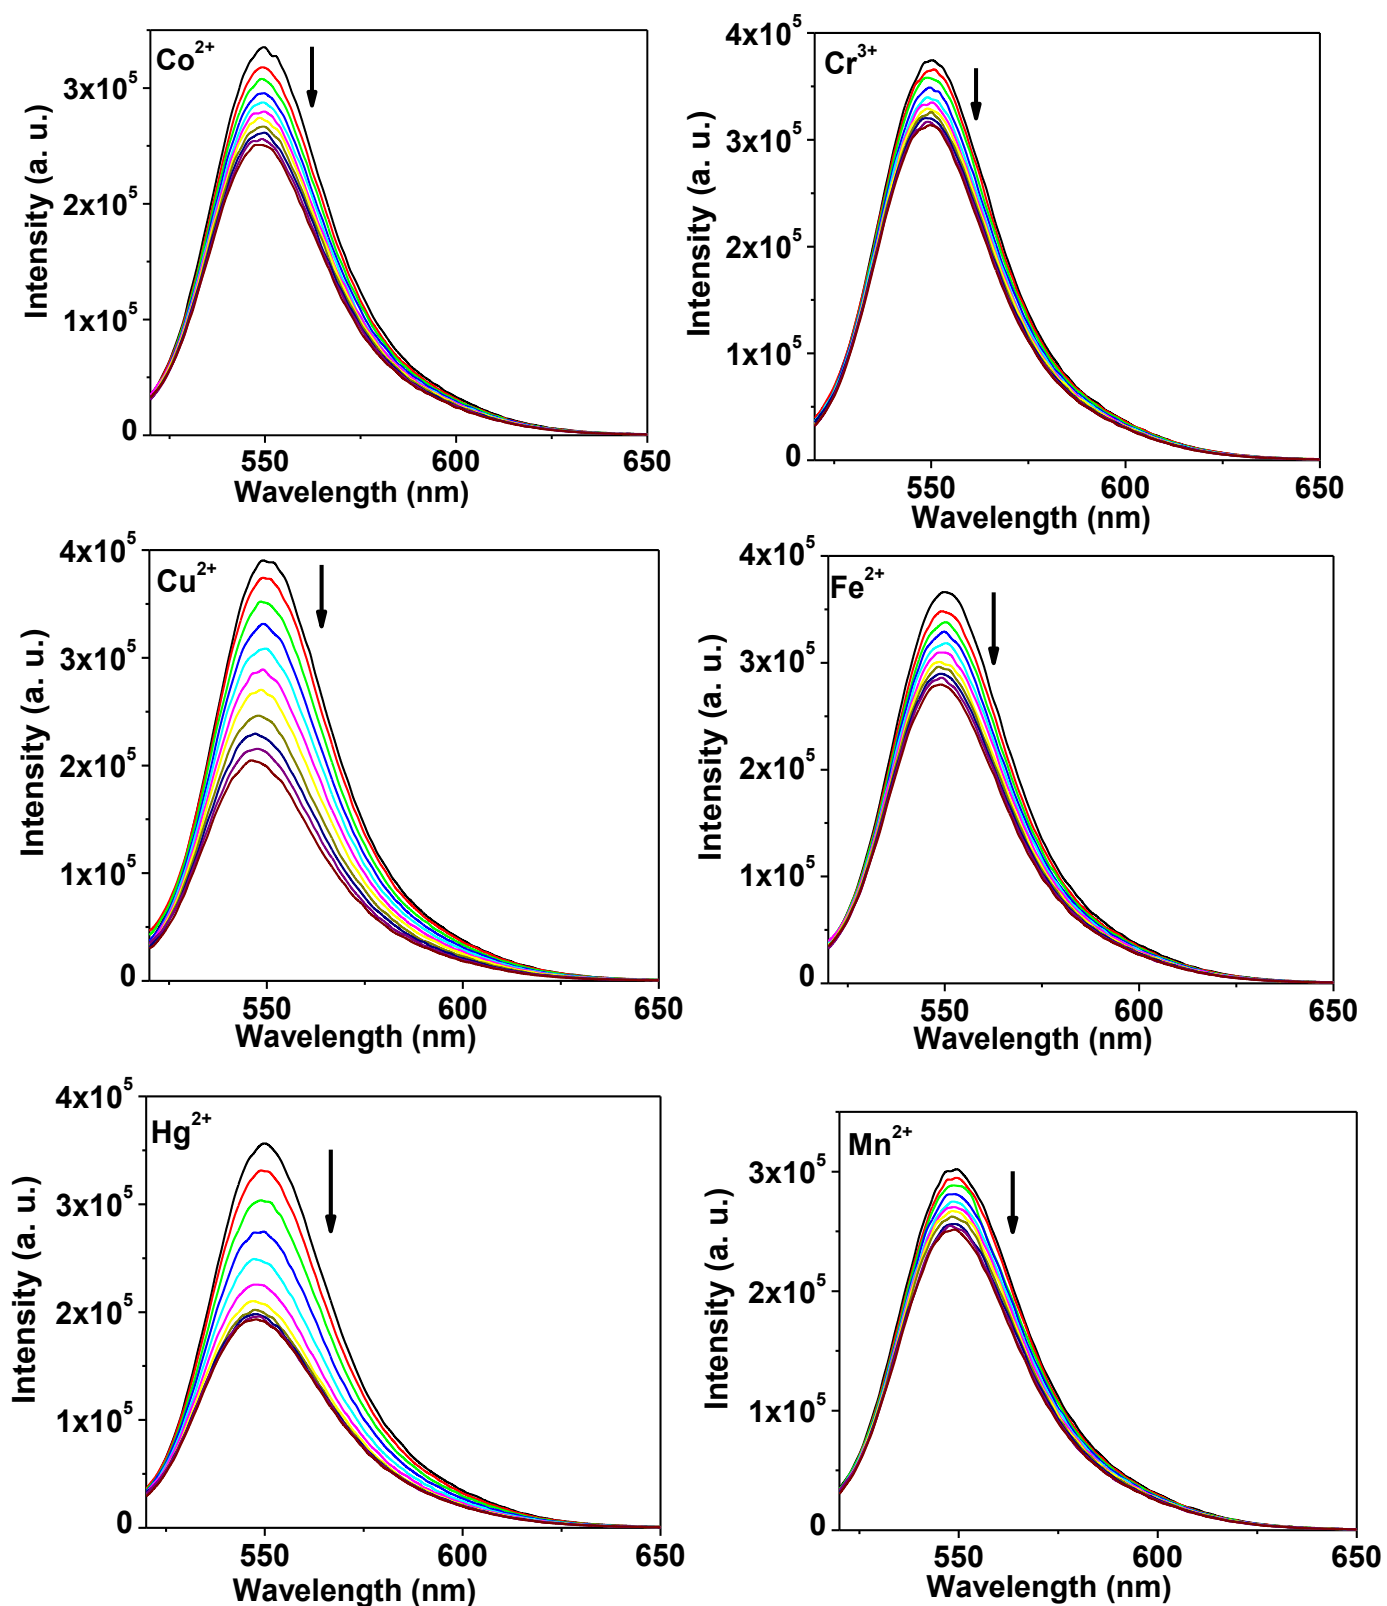

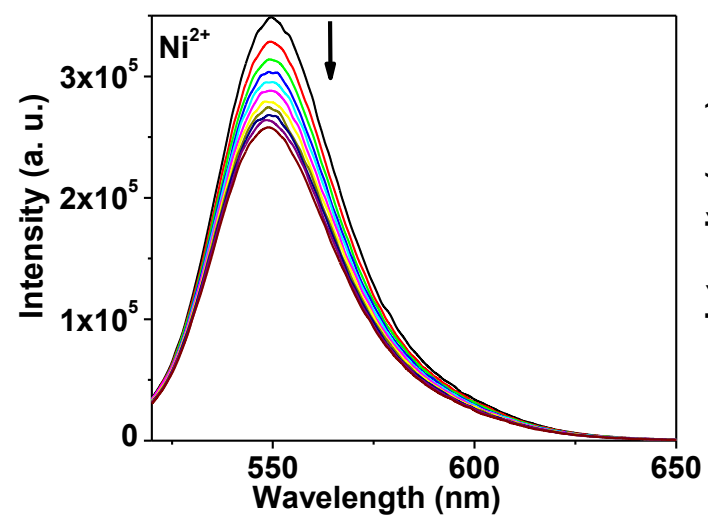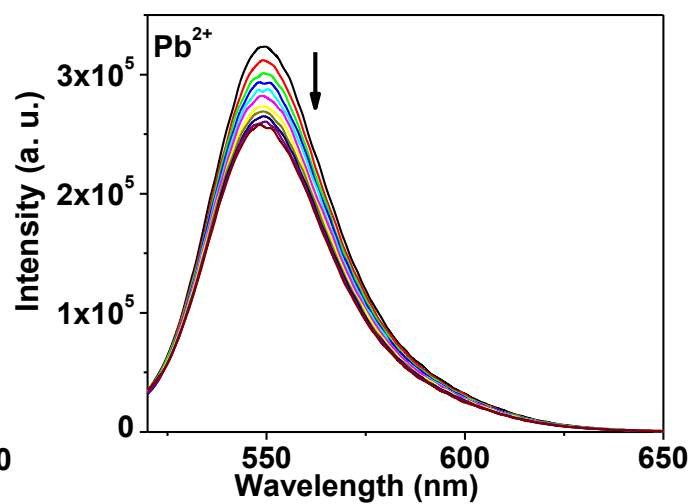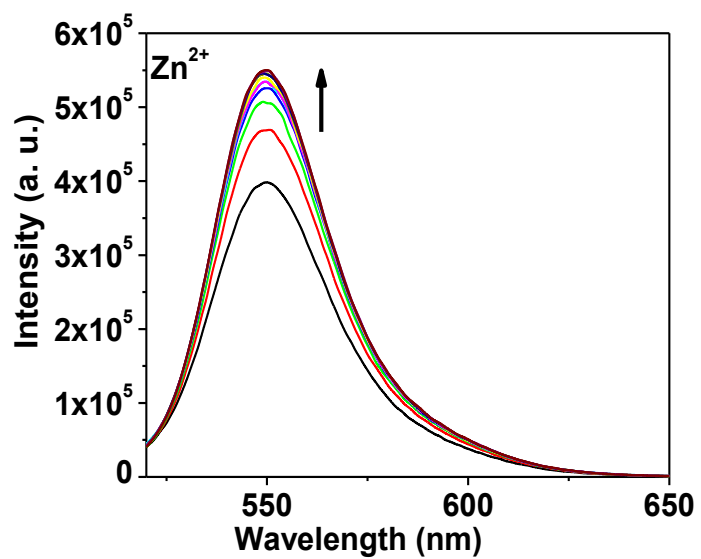

Supplement: c3an36884j.pdf [file c3an36884j.pdf]
